# Supplementary material for: Efficient electrochemical reduction of CO2promoted by the electrospun Cu1.96S/Cu tandem catalyst
Source: Royal Society of Chemistry journal article supplement (doi:10.1039/d1nr04802c), 2021-01-01
Supplement: d1nr04802c1.pdf [file d1nr04802c1.pdf]

## Supporting Information

### Efficient electrochemical reduction of CO<sub>2</sub> promoted by the electrospun

### Cu<sub>1.96</sub>S/Cu tandem catalyst

Shuo Liu, Yu Cao, Hai Liu, Huili Wang, Baoshan Zhang, Yiming Zhang, Lihong Zhang\*, Sheng Zhang\*, Jie Sun\*

Key Laboratory for Green Chemical Technology of Ministry of Education, School of Chemical Engineering and Technology, Tianjin University, Tianjin, 300072, P.R. China

\*Corresponding authors:

E-mail addresses: [zlh\\_224@163.com](mailto:zlh_224@163.com) (Lihong Zhang)

E-mail addresses: [Sheng.zhang@tju.edu.cn](mailto:Sheng.zhang@tju.edu.cn) (Sheng Zhang)

E-mail addresses: [jies@tju.edu.cn](mailto:jies@tju.edu.cn) (Jie Sun)

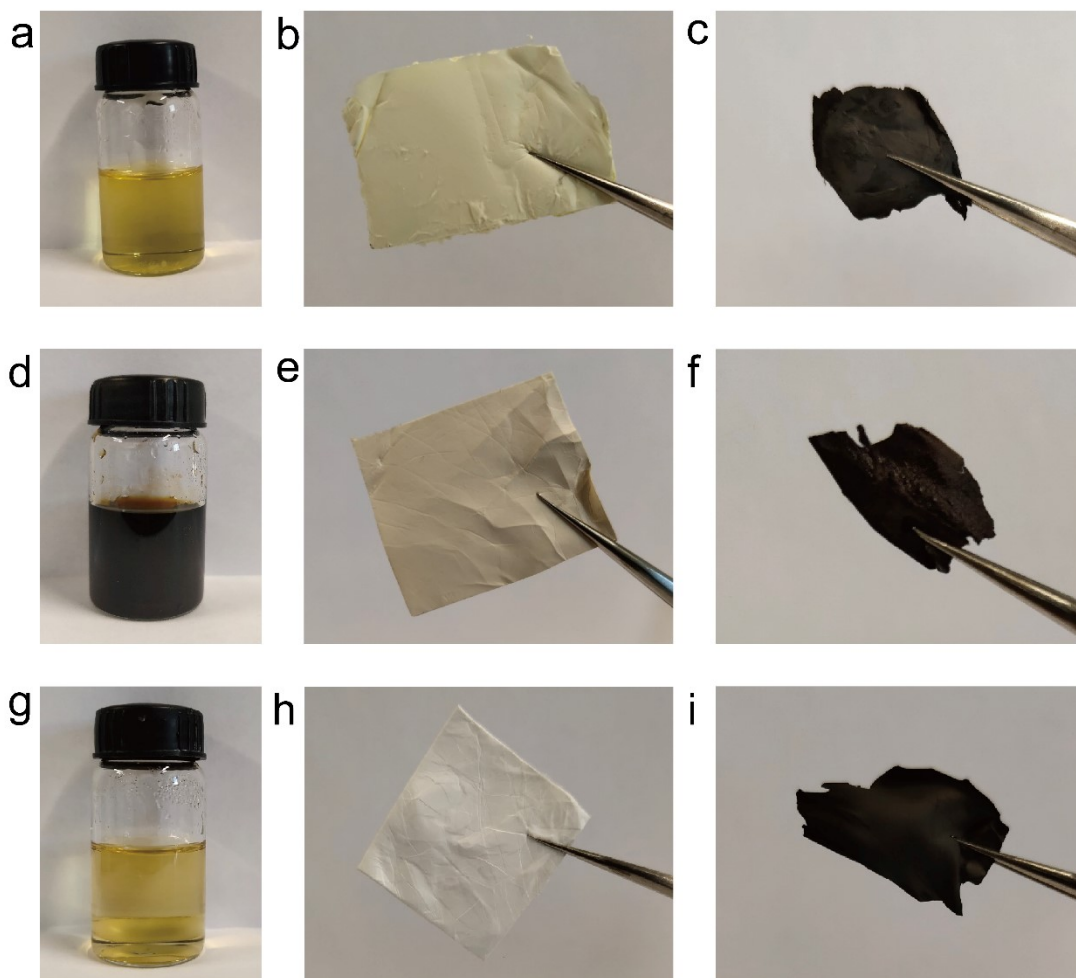

**Fig. S1.** Digital images of (a) electrospinning solution, (b) as spun nanofibers, (c) calcinated nanofibers of  $\text{Cu}_{1.96}\text{S}/\text{Cu-NCNF}$ . Digital images of (d) electrospinning solution, (e) as spun nanofibers, (f) calcinated nanofibers of  $\text{Cu-NCNF}$ . Digital images of (g) electrospinning solution, (h) as spun nanofibers, (i) calcinated nanofibers of  $\text{NCNF}$ .

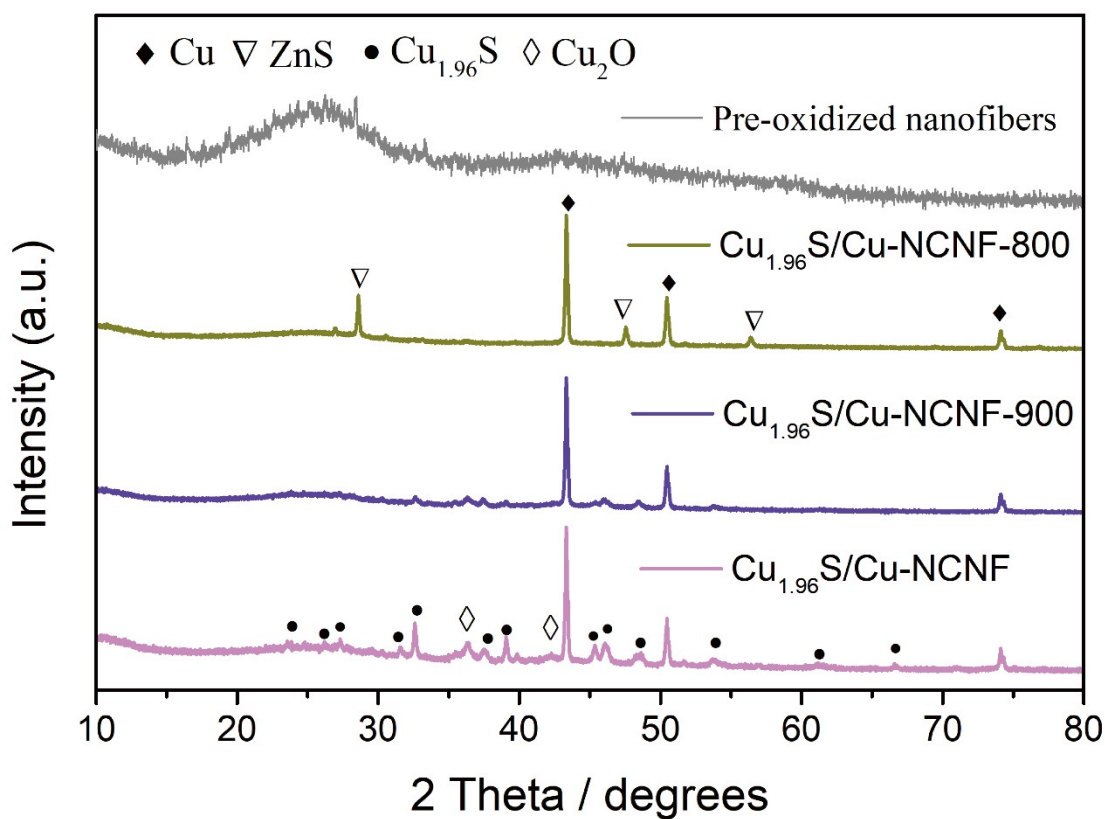

**Fig. S2.** XRD patterns of calcination of as-collected nanofibers at different temperatures. For pre-oxidized nanofibers, the weak peaks at  $28.5^\circ$ ,  $47.5^\circ$  and  $56.3^\circ$ , relating to the (111), (220) and (311) planes of hexagonal ZnS crystalline phase (JCPDS No.36-1450), and the other composition is amorphous. For  $\text{Cu}_{1.96}\text{S}/\text{Cu-NCNF-800}$ , only the peaks of Cu and ZnS are observed, while the peaks of ZnS are increasing in intensity. For  $\text{Cu}_{1.96}\text{S}/\text{Cu-NCNF-900}$ , the phase transition from zinc sulfide to copper sulfide occurred.

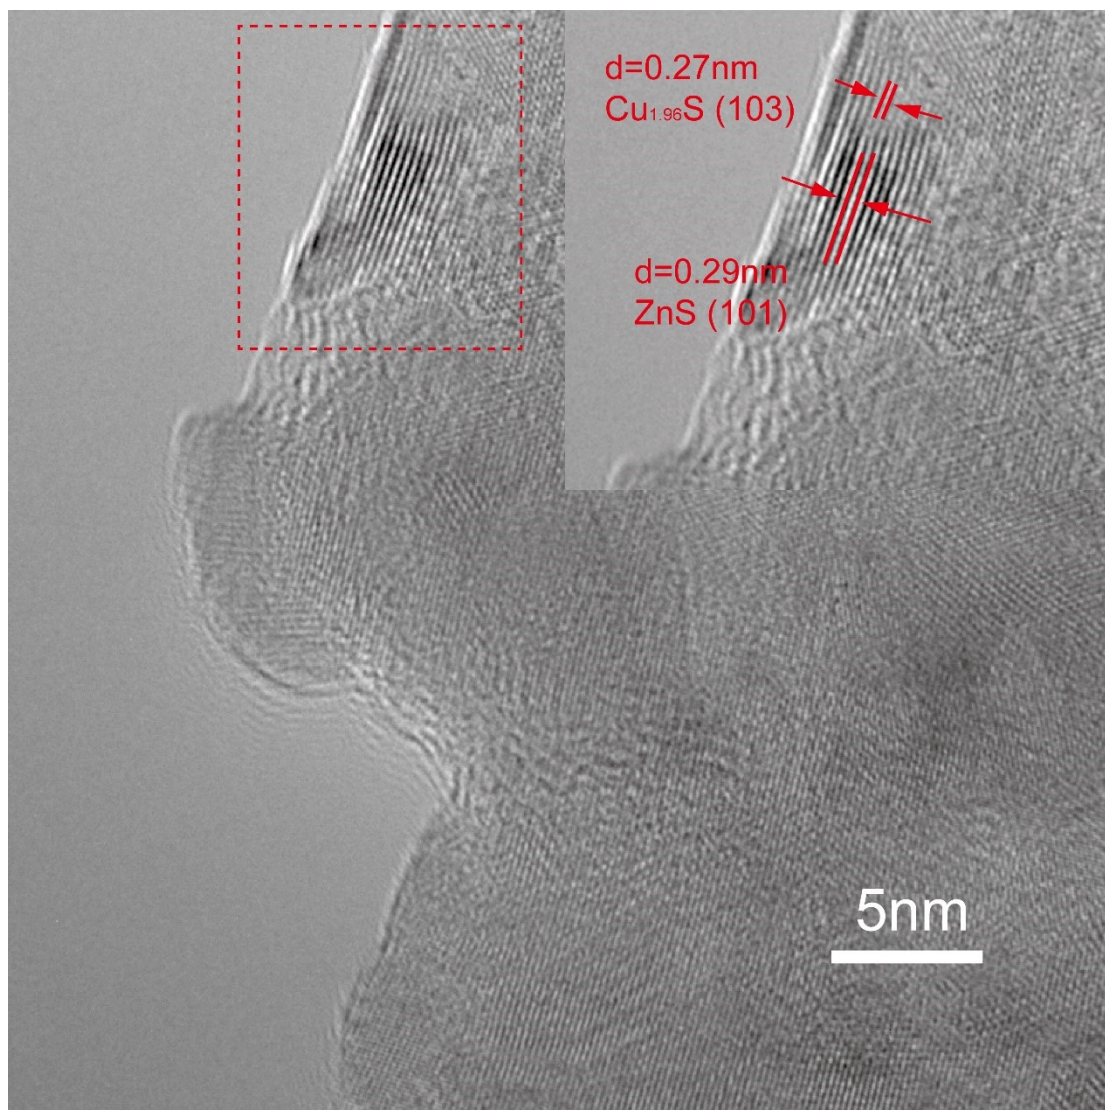

**Fig. S3.** HR-TEM image of Cu<sub>1.96</sub>S/Cu-NCNF-900.

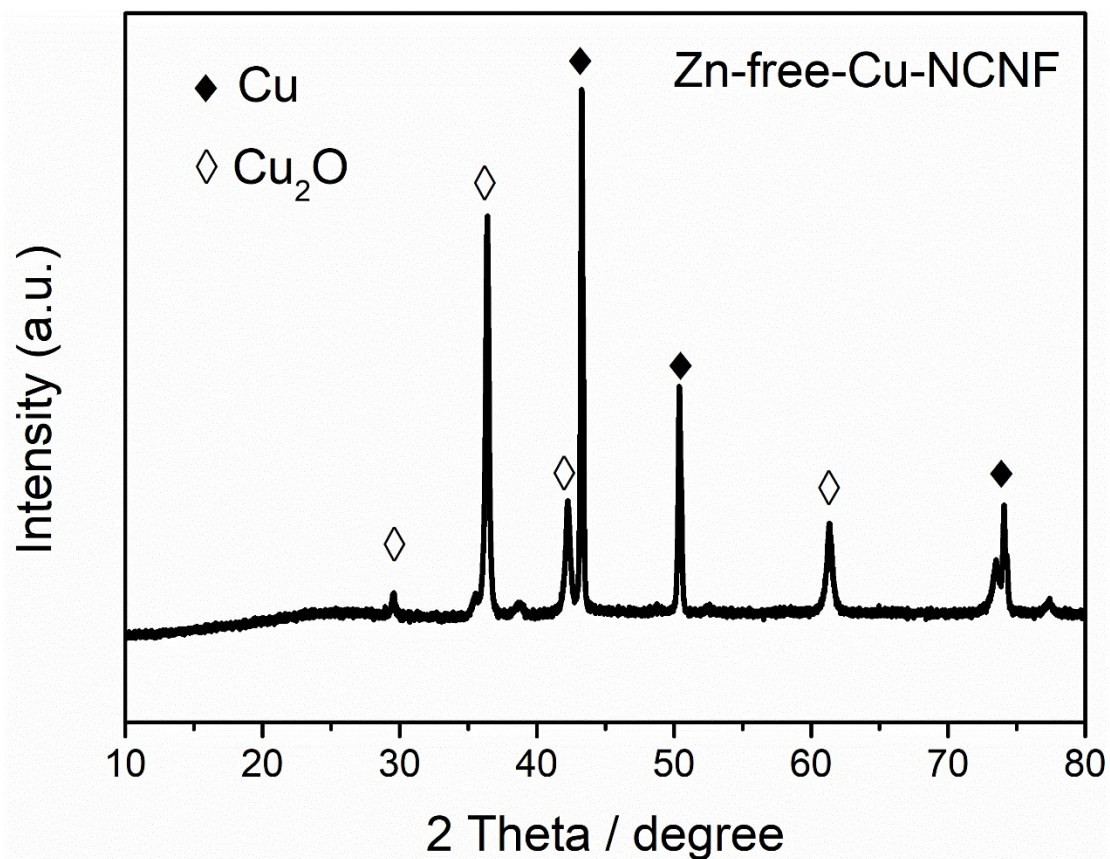

**Fig. S4.** XRD pattern of Zn-free-Cu-NCNF. The peaks at 29.6°, 36.4°, 42.3°, and 61.4° are consistent with cubic Cu<sub>2</sub>O (JCPDS No. 78-2076).

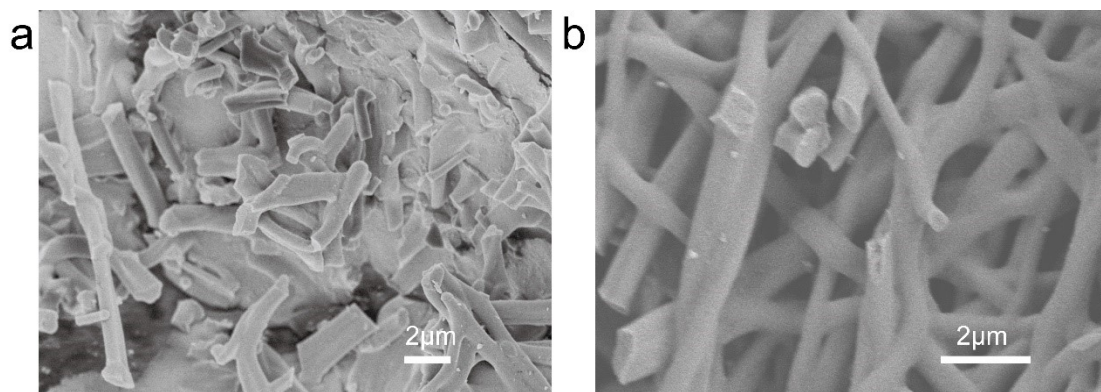

**Fig. S5.** SEM images of (a) Cu-NCNF and (b) NCNF

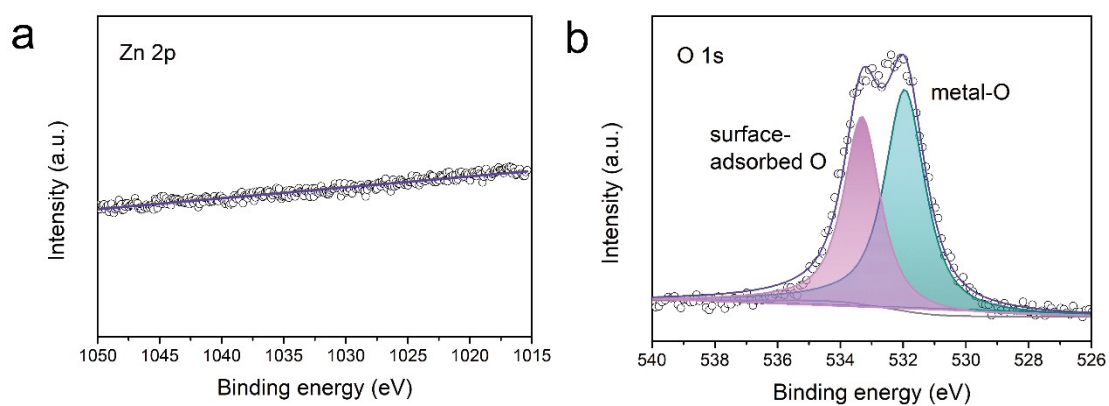

**Fig. S6.** High-resolution (a) Zn 2p, and (b) O 1s XPS spectra of  $\text{Cu}_{1.96}\text{S}/\text{Cu-NCNF}$ .

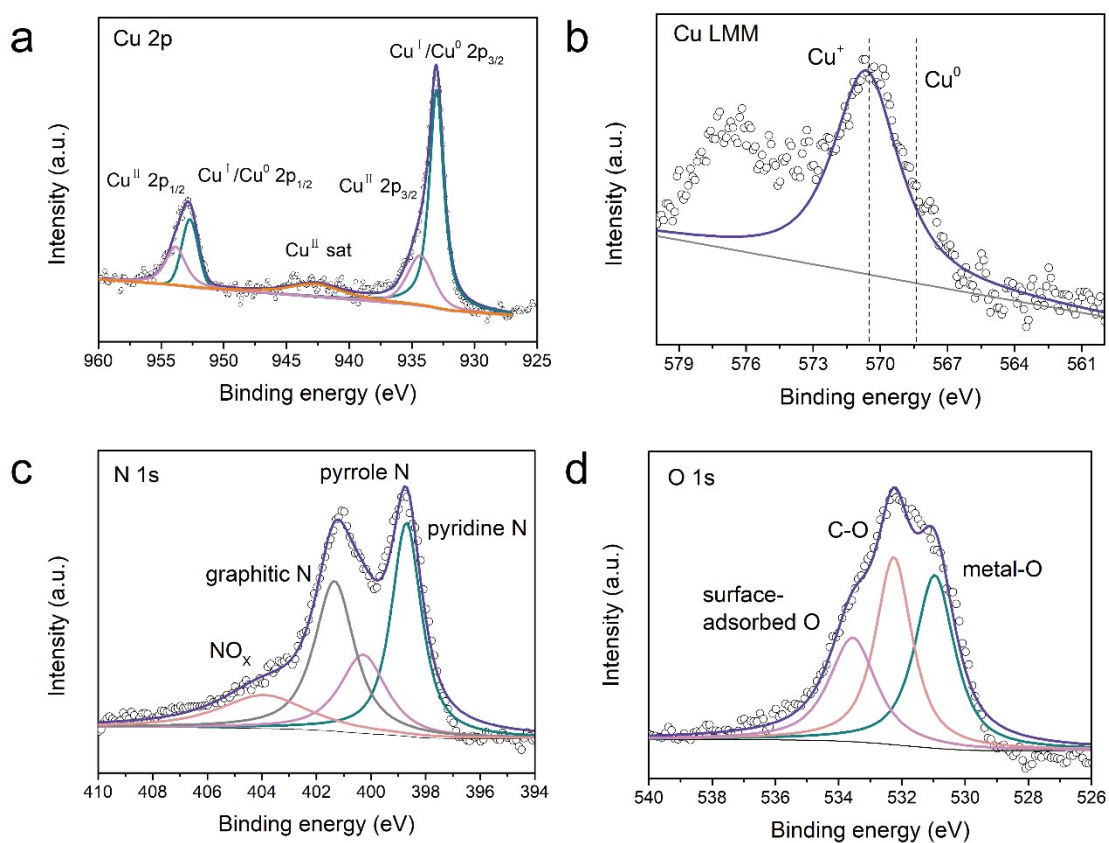

**Fig. S7.** High-resolution (a) Cu 2p, (b) Cu LMM, (c) N 1s, and (d) O 1s XPS spectra of Cu-NCNF.

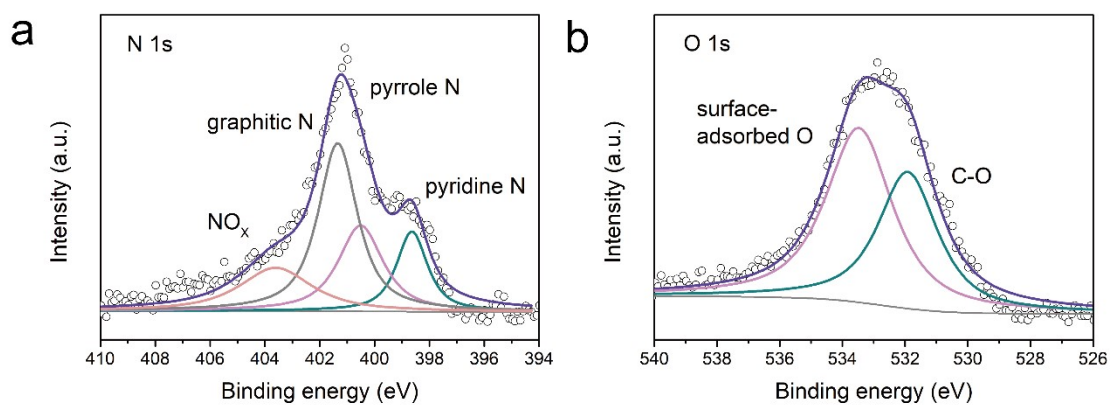

**Fig. S8.** High-resolution (a) N 1s, and (b) O 1s XPS spectra of NCNF.

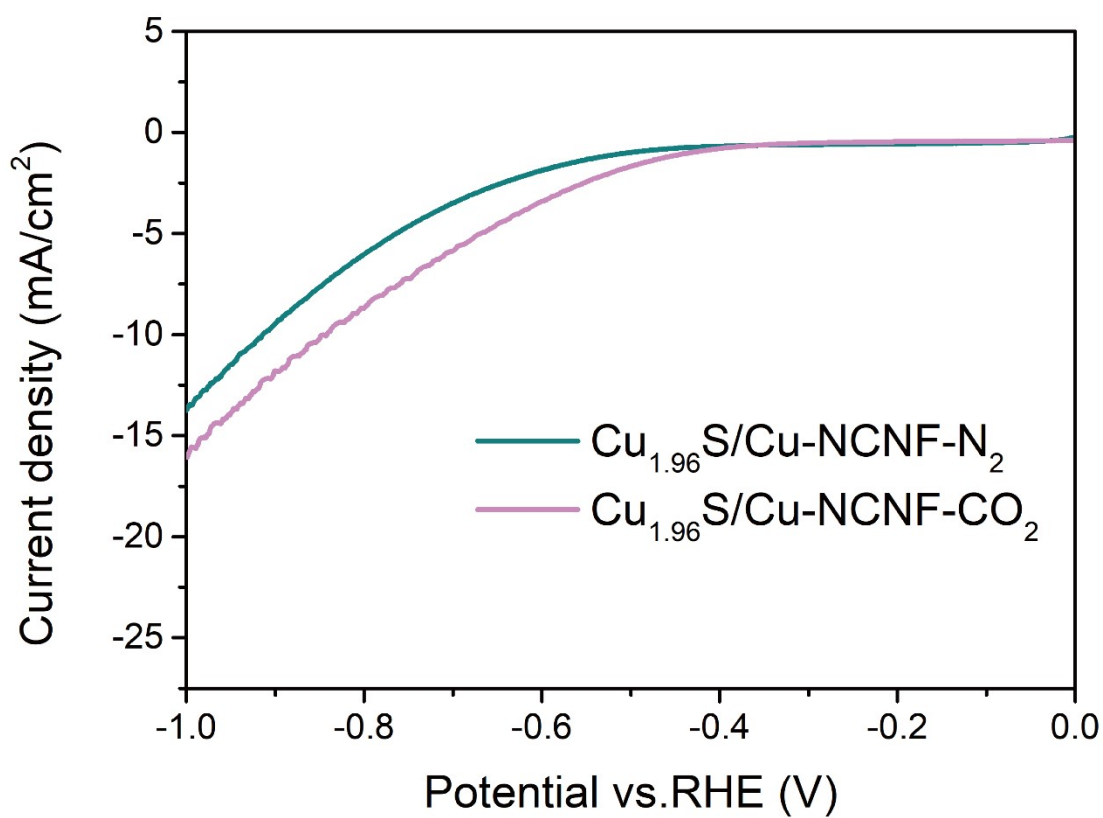

**Fig. S9.** LSV curves measured on Cu<sub>1.96</sub>S/Cu-NCNF in N<sub>2</sub>- and CO<sub>2</sub>-saturated 0.5 M KHCO<sub>3</sub> aqueous solution with a scan rate of 5 mV s<sup>-1</sup>.

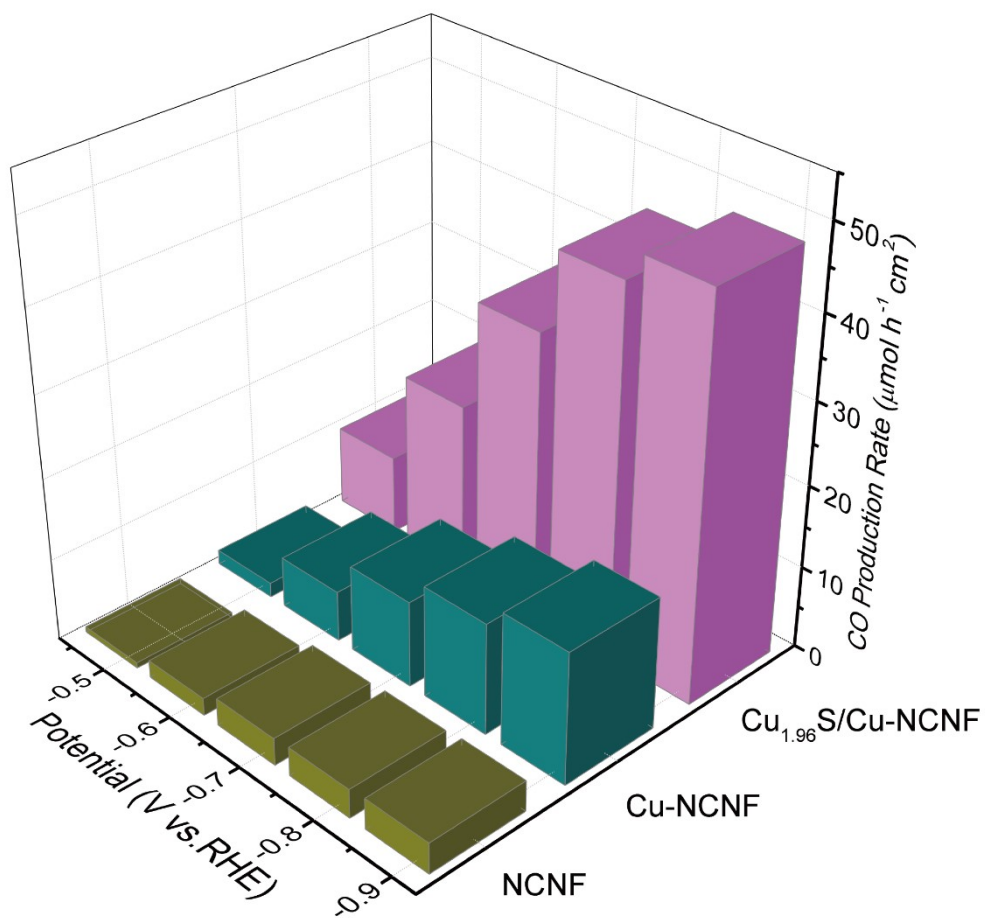

**Fig. S10.** CO production rate of  $\text{Cu}_{1.96}\text{S}/\text{Cu-NCNF}$ , Cu-NCNF and NCNF.



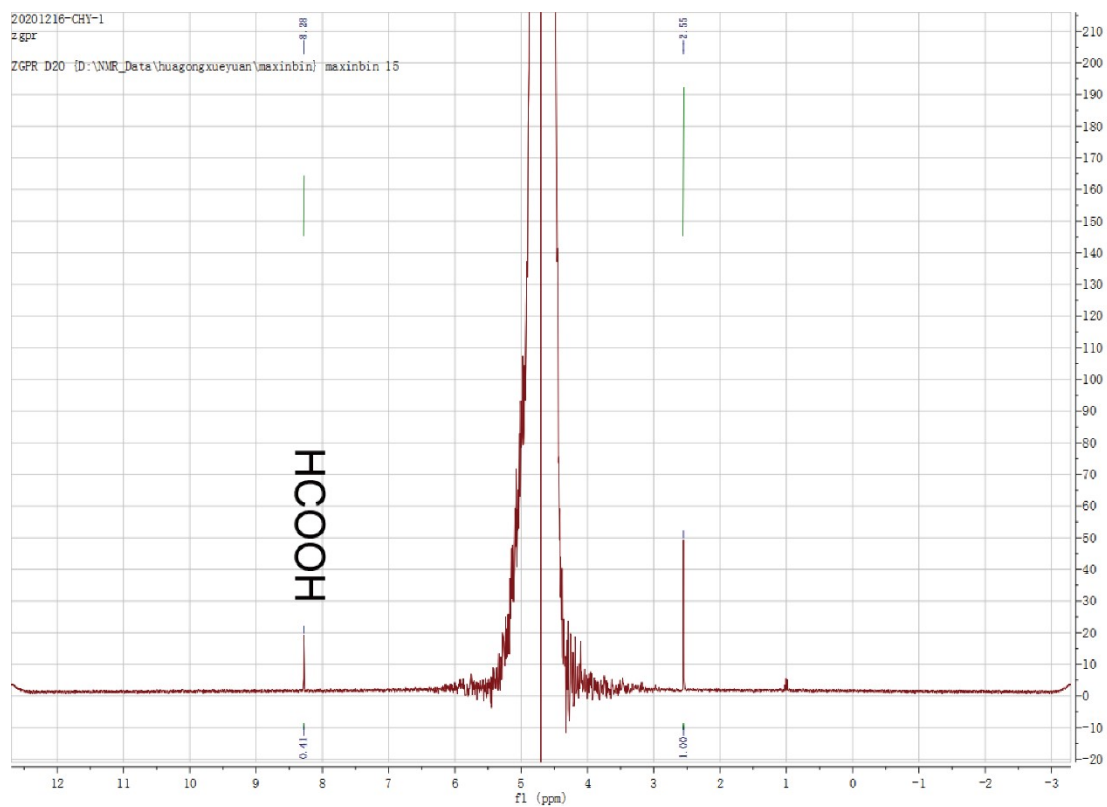

**Fig. S11.**  $^1\text{H}$  NMR spectra of liquid products for  $\text{CO}_2\text{RR}$  at  $-0.68$  vs. RHE over  $\text{Cu}_{1.96}\text{S}/\text{Cu-NCNF}$ . Only  $\text{HCOOH}$  is found as the liquid product and  $\text{FE}_{\text{HCOOH}}$  is about 8%.

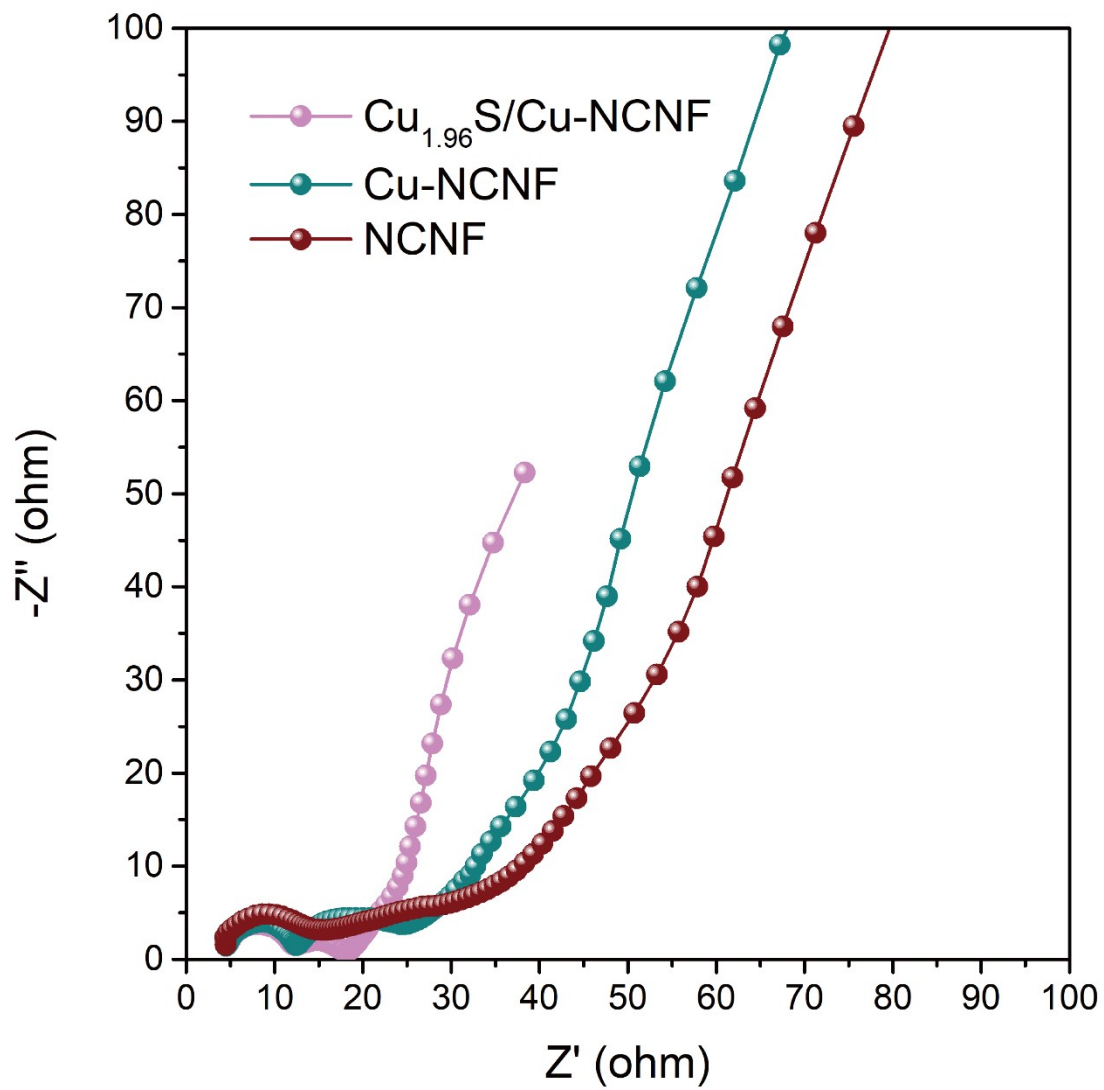

**Fig. S12.** Nyquist plots of Cu<sub>1.96</sub>S/Cu-NCNF, Cu-NCNF and NCNF.

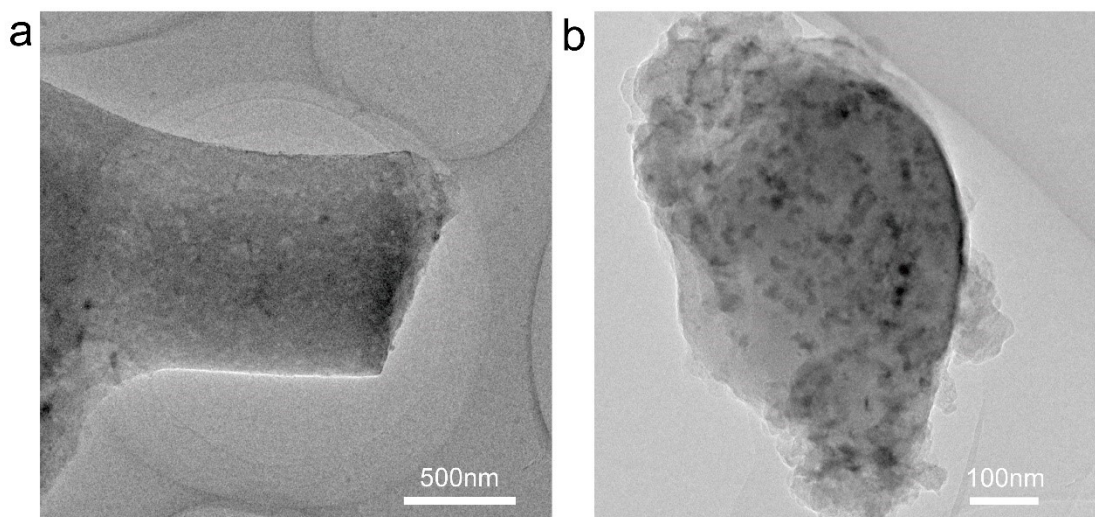

**Fig. S13.** TEM image of Cu<sub>1.96</sub>S/Cu-NCNF before (a) and after (b) CO<sub>2</sub>RR.

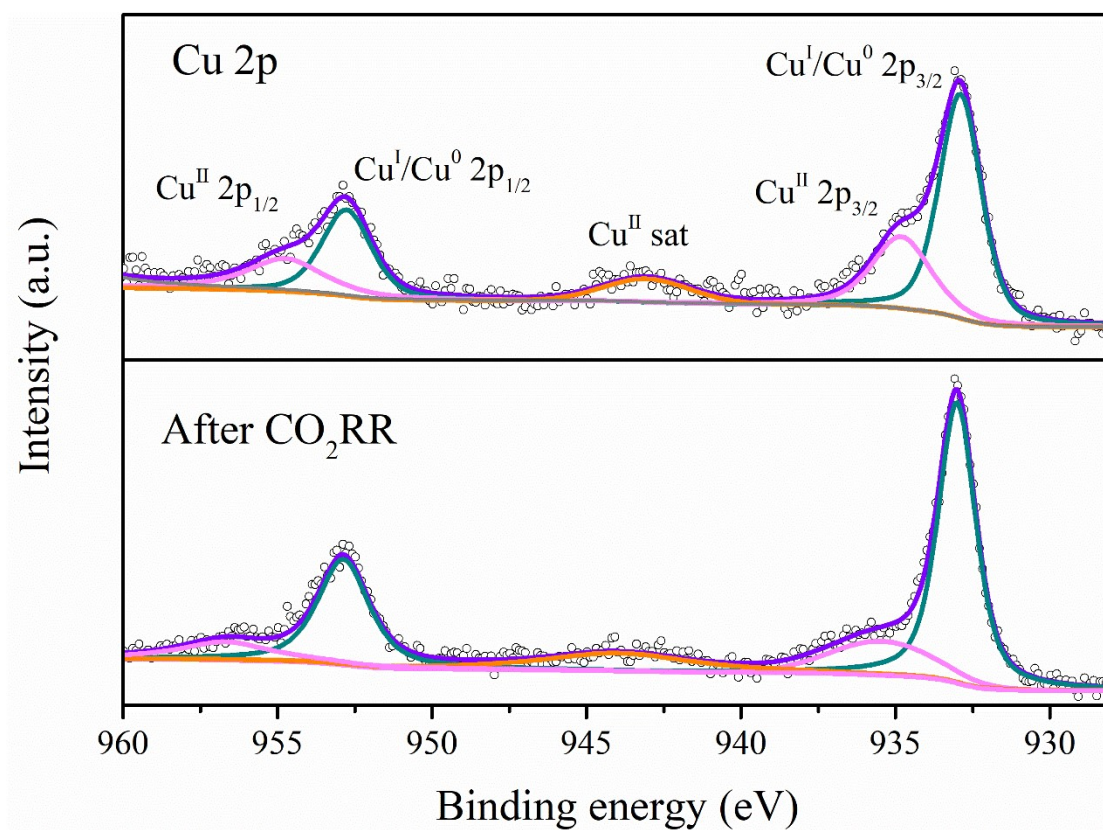

**Fig. S14.** XPS spectra of Cu 2p in Cu<sub>1.96</sub>S/Cu-NCNF before and after CO<sub>2</sub>RR.

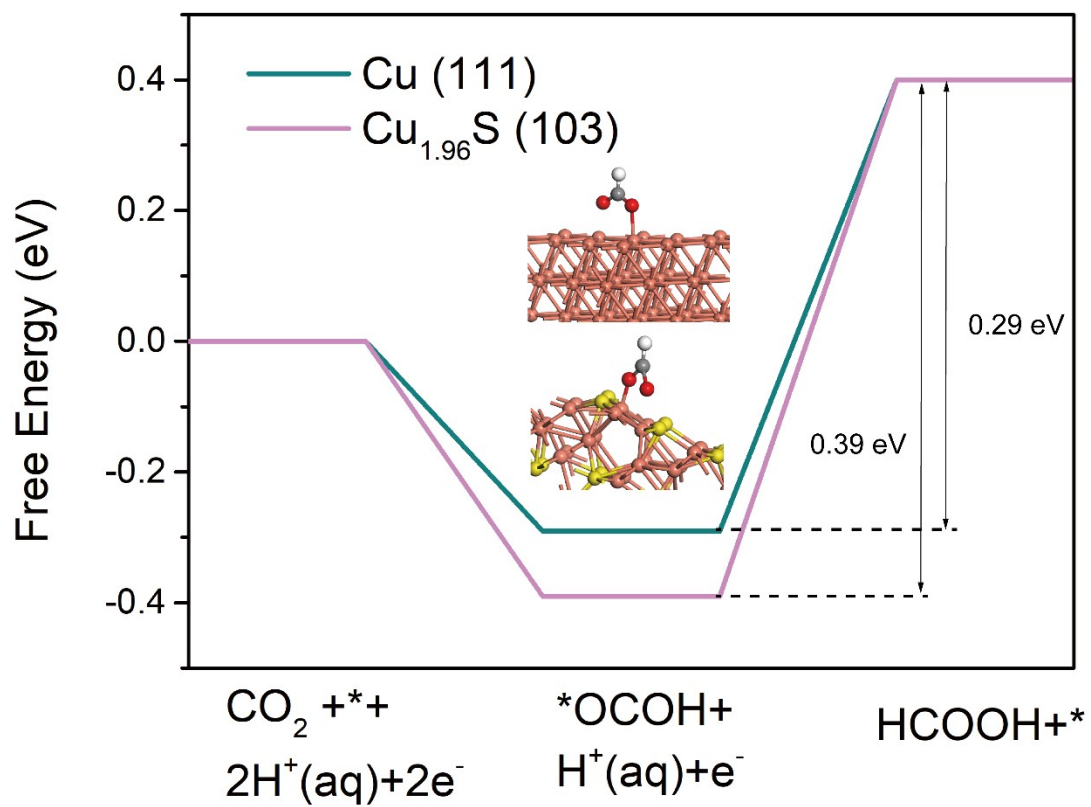

**Fig. S15.** Gibbs free energy diagrams for HCOOH path of Cu and Cu<sub>1.96</sub>S.

**Table S1.** Summary of performances for reducing CO<sub>2</sub> to formate and methane on different S-modified copper.

| Product         | Catalysts                         | Potential (V vs. RHE) | Faradic efficiency (%) | Reference |
|-----------------|-----------------------------------|-----------------------|------------------------|-----------|
| CH <sub>4</sub> | CuS nanosheet arrays              | -1.1                  | 73%                    | [1]       |
| HCOOH           | Sulfide-derived copper            | -0.8                  | ~50%                   | [2]       |
|                 | Cu <sub>2</sub> O/CuO/CuS         | -0.7                  | 84%                    | [3]       |
|                 | CuS <sub>x</sub>                  | -0.6                  | 72%                    | [4]       |
|                 | Cu <sub>1.81</sub> S@WMCNT-600-OD | -0.67                 | 82%                    | [5]       |
|                 | Sulfur-Doped Copper               | -0.8                  | 75%                    | [6]       |

**Table S2.** XPS Peak Table of Cu<sub>1.96</sub>S/Cu-NCNF and Cu-NCNF.

| Name                             | Atomic % |       |      |       |      |       |
|----------------------------------|----------|-------|------|-------|------|-------|
|                                  | Cu 2p    | Zn 2p | S 2p | C 1s  | N 1s | O 1s  |
| Cu <sub>1.96</sub> S/Cu-NCNF     | 0.47     | 0     | 0.54 | 85.27 | 1.98 | 11.74 |
| Cu <sub>1.96</sub> S/Cu-NCNF-900 | 0.58     | 0.55  | 0.66 | 83.76 | 6.67 | 7.79  |

**Table S3.** Zero-point energy and entropy contribution to the total free energy of molecules and adsorbates. All values are reported by Nørskov [7].

| Species          | $\Delta ZPE$ (eV) | - T $\Delta S$ (eV) |
|------------------|-------------------|---------------------|
| H <sub>2</sub>   | 0.27              | -0.39               |
| H <sub>2</sub> O | 0.58              | -0.65               |
| CO <sub>2</sub>  | 0.31              | -0.65               |
| CO               | 0.14              | -0.6                |
| *H               | 0.16              | -0.007              |
| *COOH            | 0.62              | -0.18               |
| *CO              | 0.19              | -0.15               |
| *OCHO            | 0.62              | -0.23               |

## References

- 1 Z. Zhao, X. Peng, X. Liu, X. Sun, J. Shi, L. Han, G. Li, J. Luo, J. Mater. Chem. A, 2017, 5, 20239-20243.
- 2 K. R. Phillips, Y. Katayama, J. Hwang, Y. Shao-Horn, J. Phys. Chem. Lett., 2018, 9, 4407-4412.
- 3 A. W. Kaysay, K. B. Ibrahim, M. C. Tsai, M. K. Birhanu, S. A. Chala, W. N. Su, B. J. Hwang, Catal. Lett., 2019, 149, 860-869.

- 4 J. W. Lim, W. J. Dong, J. Y. Park, D. M. Hong, J. L. Lee, ACS Appl. Mater. Interfaces, 2020, 12, 22891-22900.
- 5 B. Zhang, M. Wang, J. Ding, Y. Li, G. Cao, M. T. Bernardis, Y. He, Y. Shi, J. CO<sub>2</sub> Util., 2020, 39, 101169.
- 6 Y. Huang, Y. Deng, A. D. Handoko, G. K. L. Goh, B. S. Yeo, ChemSusChem, 2018, 11, 320-326.
- 7 H. A. Hansen, J. B. Varley, A. A. Peterson, J. K. Nørskov, J. Phys. Chem. Lett., 2013, 4, 388-392.
